# Supplementary material for: Hepatoprotective Effect of Kombucha Tea in Rodent Model of Nonalcoholic Fatty Liver Disease/Nonalcoholic Steatohepatitis
Source: PubMed Central journal article supplement (PMC6539514; doi:10.3390/ijms20092369), 2019-05-13
Supplement: ijms-20-02369-s001.pdf [file ijms-20-02369-s001.pdf]

**Supplementary Materials to**

**Hepatoprotective Effect of Kombucha Tea in Rodent Model of Nonalcoholic  
Steatohepatitis**

Chanbin Lee, Jieun Kim, Sihyung Wang, Sumi Sung, Namgyu Kim, Hyun-Hee Lee, Young-  
Su Seo, and Youngmi Jung

**Table of Contents**

|                            |   |
|----------------------------|---|
| Supplementary Table .....  | 2 |
| Supplementary Figure ..... | 4 |

## Supplementary Table

**Table S1. Changes in liver weight and body weight in experimental animal.**

| Parameter        | db/db Mice     |                  |                    |
|------------------|----------------|------------------|--------------------|
|                  | CON            | M + V            | M + K              |
| Liver weight (g) | 1.916 ± 0.177  | 1.304 ± 0.044*   | 1.404 ± 0.071*     |
| Body weight (g)  | 29.810 ± 3.530 | 24.992 ± 0.615** | 27.933 ± 0.933**/# |
| LW/BW ratio      | 0.065 ± 0.002  | 0.052 ± 0.001**  | 0.500 ± 0.002**    |

Liver weight (LW), Body weight (BW), and the ratio of liver to body weight (LW/BW) of CON, M+V and M+K groups. (\* $p < 0.05$ , \*\* $p < 0.005$  vs CON group, # $p < 0.05$ , ## $p < 0.005$  vs M+V group)

**Table S2. Mouse primer sequences used for QRT-PCR**

| GENE             | Forward                         | Reverse                         |
|------------------|---------------------------------|---------------------------------|
| <i>G6pc</i>      | 5'-TCCTCCTCAGCCTATGTCTGCATTC-3' | 5'-GAGAGAAGAATCCTGGGTCTCCTTG-3' |
| <i>9s</i>        | 5'-GGGCCTGAAGATTGAGGATT-3'      | 5'-CGGGCATGGTGAATAGATTT-3'      |
| <i>Cd36</i>      | 5'-TCCTCTGACATTTGCAGGTCTATC-3'  | 5'-AAAGGCATTGGCTGGAAGAA-3'      |
| <i>Pparγ</i>     | 5'-CACAATGCCATCAGGTTTGG-3'      | 5'-GCTGGTCGATATCACTGGAGATC-3'   |
| <i>Fas</i>       | 5'-GCTGCGGAACTTCAGGAAAT-3'      | 5'-AGAGACGTGTCACTCCTGGACTT-3'   |
| <i>Srebp1c</i>   | 5'-GGAGCCATGGATTGCACATT-3'      | 5'-GGCCCGGGAAGTCACTGT-3'        |
| <i>Dgat2</i>     | 5'-CTGGCTGATAGCTGCTCTCTACTTC-3' | 5'-TGTGATCTCCTGCCACCTTTC -3'    |
| <i>Fabp1</i>     | 5'-CCAGGAGAAGCTTTGAGCCATTC-3'   | 5'-TGTCCTTCCCTTTCTGGATGA -3'    |
| <i>Pppargc1α</i> | 5'-CAGAGGATGGACTGTAAAGG-3'      | 5'-CGGCACTTCTTGATCAAGCC-3'      |
| <i>Ppara</i>     | 5'-CAGGAGAGCAGGGATTTGCA-3'      | 5'-CCTACGCTCAGCCCTCTTCAT-3'     |
| <i>Aox1</i>      | 5'-CAGGAAGAGCAAGGAAGTCC-3'      | 5'-CCTTTCTGGCTGATCCCATA-3'      |
| <i>Cpt1</i>      | 5'-CAGAGGATGGACTGTAAAGG-3'      | 5'-CGGCAGTTCTTGATCAAGCC-3'      |
| <i>Mcad</i>      | 5'-GATGCATCACCTCGTGTAAC-3'      | 5'-AAGCCCTTTTCCCCTGAAG-3'       |
| <i>Cxcl1</i>     | 5'-CCCAAACCGAAGTCATAGCC-3'      | 5'-TCAGAAGCCAGCGTTCACC-3'       |
| <i>Cxcl2</i>     | 5'-GCCCAGACAGAAGTCATAGCC-3'     | 5'-TTCTCTTTGGTTCTTCCGTTGA-3'    |
| <i>Il-1β</i>     | 5'-ACTCCTTAGTCCGCCA-3'          | 5'-TGGTTTCTTGTGACCCTGAGC-3'     |
| <i>Tnfa</i>      | 5'-TCGTAGCAAACCACCAAGTG-3'      | 5'-ATATAGCAAATCGGCTGACG -3'     |
| <i>Shh</i>       | 5'-CTGGCCAGATGTTTTCTGGT-3'      | 5'-GATGTCGGGGTTGTAATTGG-3'      |
| <i>Smo</i>       | 5'-CAGCAAGATCTTCGAGACCA-3'      | 5'-AAGTGGCAGATGAAGGTGAT-3'      |
| <i>Gli2</i>      | 5'-CAAGCAGAACAGCGAGTCAC-3'      | 5'-CCTCAGCCTCAGTCTTGACC-3'      |
| <i>Tgfβ</i>      | 5'-TTGCCCTCTACAACCAACACAA-3'    | 5'-GGCTTGCGACCCACGTAG-3'        |
| <i>α-sma</i>     | 5'-AAACAGGAATACGACGAAG-3'       | 5'-CAGGAATGATTTGGAAAGGA-3'      |
| <i>Col1α1</i>    | 5'-GAGCGGAGAGTACTGGATCG-3'      | 5'-GCTTCTTTTCTTGGGGTTC-3'       |
| <i>Ctgf</i>      | 5'-ACTGCCCTTCCCGAGAA-3'         | 5'-TCCTTGGGCTCGTCACACA-3'       |
| <i>Timp1</i>     | 5'-CCTTGCAAACCTGGAGAGTGACA-3'   | 5'-AAGCAAAGTGACGGCTCTGGT-3'     |

## Supplementary Figure

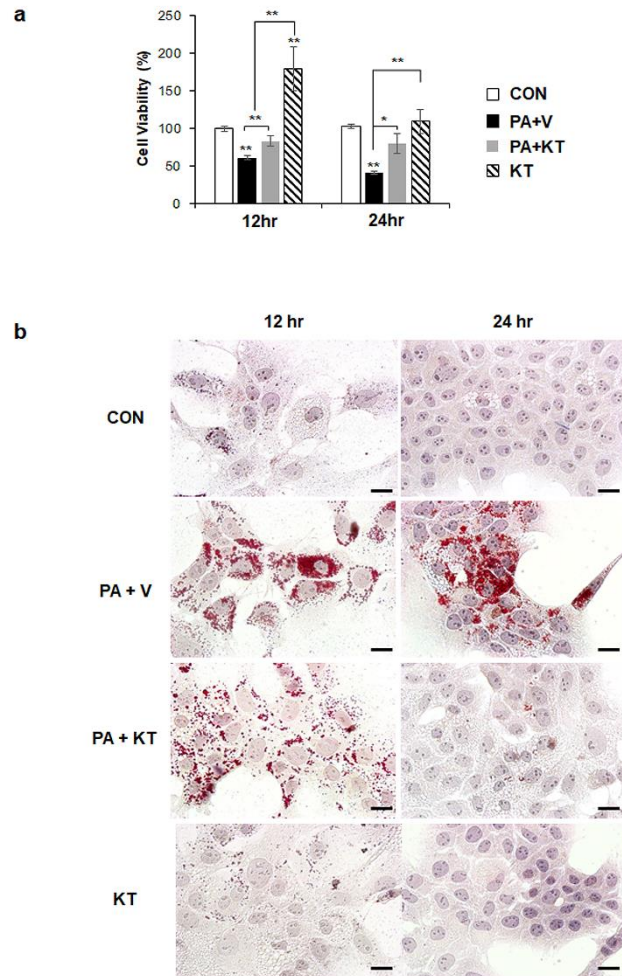

**Figure S1 KT increases viability of and suppress lipid accumulation in PA-injured AML12**

(a) Cell viability of AML12, normal hepatocyte cell line originated from mouse, treated with KT was analyzed using MTS assay. After being exposed to 250 $\mu$ M of palmitate (PA) for 24hours, primary hepatocytes were treated with vehicle (PA + V) or KT (PA+KT) for 12 and 24 hours. As a control, AML12 was treated with equal volume of vehicle (BSA) without PA for 24 hours, and then given with (KT) or without KT (CON). The mean $\pm$ SEM results obtained from three repetitive experiments are graphed (\* $p$ <0.05, \*\* $p$ <0.005 vs CON). (b) Oil red O staining in these cells. Representative images are shown (Scale bars: 20 $\mu$ m)
